# Supplementary material
Source: PubMed Central journal article supplement (PMC8363793)
Supplement: ocab089_supplementary_data.pdf [file ocab089_supplementary_data.pdf]

```
In [1]: import pandas as pd
import numpy as np
import matplotlib.pyplot as plt
import seaborn as sns

import time
from sklearn.model_selection import train_test_split
from sklearn.ensemble import RandomForestRegressor, GradientBoostingRegressor
from sklearn.model_selection import GridSearchCV, RandomizedSearchCV
from sklearn.inspection import permutation_importance
import warnings
warnings.filterwarnings("ignore")

from sklearn.linear_model import LassoCV
from sklearn.datasets import make_regression
from sklearn.linear_model import ElasticNetCV
```

```
In [2]: admits = pd.read_csv('admission.csv')
discharges = pd.read_csv('discharge.csv')
census = pd.read_csv('census.csv')
#predisc_orders = pd.read_csv('count_Prepare.for.Discharge.Order.Instant.csv')
#transport = pd.read_csv('count_Transport.Requested.csv')
#avs_firstprint = pd.read_csv('count_AVS.First.Print.csv')
#surgeries = pd.read_csv('scheduled_surgeries.csv')
#surgeries.rename(columns = {'Count': 'scheduled_surgery_count'}, inplace = True)
```

```
In [3]: #this combines the different tables into a single dataset

admits.rename(columns = {"med": "med_admits", "surg": "surg_admits", "Total": "total_admits"}, inplace = True)
discharges.rename(columns = {"med": "med_disc", "surg": "surg_disc", "Total": "total_disc"}, inplace = True)
census.rename(columns = {"med": "med_census", "surg": "surg_census", "Total": "total_census"}, inplace = True)

#dataframes where the column with information has a different name
suffixes = ['a,b,c,d,e']
dataframes1 = (admits, discharges)
dataframe_names1 = ['admits', 'discharges', 'surgeries']

#dataframes where the column with information has the same name
#dataframes2 = (predisc_orders, transport, avs_firstprint)
#dataframe_names2 = ['predisc_orders', 'transport', 'avs_firstprint']

df = census
for (i, dataframe) in enumerate(dataframes1):
    cols_to_use = dataframe.columns.difference(df.columns)
    cols_to_use = cols_to_use.append(pd.Index(['times']))
    print(cols_to_use)
    df = df.merge(dataframe[cols_to_use], on = 'times', how = 'left', suffixes = ('', dataframe_names1[i]))

#cols_to_use = ['Total', 'med', 'surg', 'times']
#for (i, dataframe) in enumerate(dataframes2):
#    df = df.merge(dataframe[cols_to_use], how = 'left', on='times', suffixes = ('', '_' + dataframe_names2[i]))

#df.rename(columns = {"Total": 'total_predisc_orders', 'med': 'med_predisc_orders', 'surg': 'surg_predisc_orders'}, inplace=True)
#df = census
#cols_to_use = discharges.columns.difference(df.columns)
#df = df.join(discharges[cols_to_use], how = 'left', rsuffix = "_d")
#cols_to_use = admits.columns.difference(df.columns)
#df = df.join(admits[cols_to_use], how = "left", rsuffix = "_a")

Index(['med_admits', 'surg_admits', 'total_admits', 'times'], dtype='object')
Index(['med_disc', 'surg_disc', 'total_disc', 'times'], dtype='object')
```

```
In [4]: census.times[18000]
```

```
Out[4]: '2020-06-20 00:00:00'
```

```
In [5]: plt.figure(figsize=(18,8))
plt.xlabel('times')

ax1 = df.total_census[15000:].plot(color='blue', grid=True, label='true census', linewidth = 0.7, alpha = 0.5)

h1, l1 = ax1.get_legend_handles_labels()

plt.legend(h1, l1, loc=2)
plt.show()
```

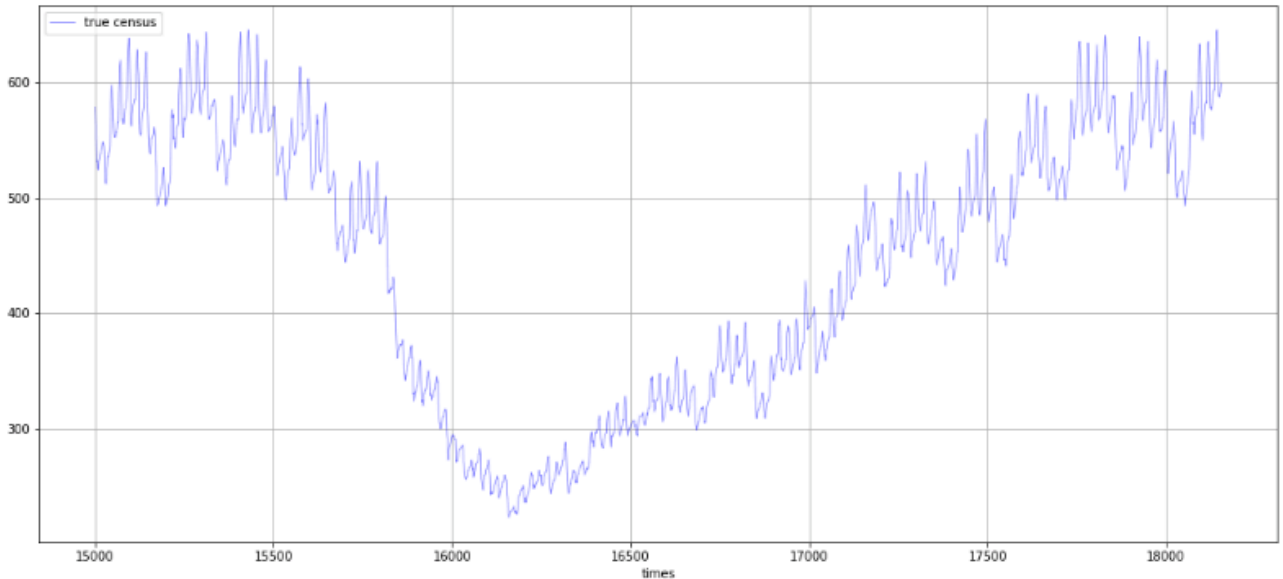

```
In [6]: df.columns
```

```
Out[6]: Index(['Unnamed: 0', 'times', 'med_census', 'surg_census', 'Day_week',
              'total_census', 'Time', 'date', 'med_admits', 'surg_admits',
              'total_admits', 'med_disc', 'surg_disc', 'total_disc'],
             dtype='object')
```

```
In [7]: #create delta variables

variables = ['med_admits', 'surg_admits',
            'total_admits', 'med_disc', 'surg_disc', 'total_disc']

vars3h = ['med_admits', 'surg_admits',
          'total_admits', 'med_disc', 'surg_disc', 'total_disc']

vars24h = ['med_admits', 'surg_admits',
           'total_admits', 'med_disc', 'surg_disc', 'total_disc']

#varsforward = ['scheduled_surgery_count']
#for lookback in [3,8,24]:
#    for variable in variables:
#        name = 'prev_' + str(lookback) + 'h_' + str(variable)
#        df[name] = df[variable].rolling(min_periods=1, window=lookback).sum()

for variable in vars3h:
    name = 'prev_' + str(3) + 'h_' + str(variable)
    df[name] = df[variable].rolling(min_periods=1, window=3).sum()

for variable in vars24h:
    name = 'prev_' + str(24) + 'h_' + str(variable)
    df[name] = df[variable].rolling(min_periods=1, window=24).sum()

#for variable in varsforward:
#    name = 'next_' + str(8) + 'h_' + str(variable)
#    df[name] = df[variable].rolling(min_periods=1, window=24).sum()
#    df[name] = df[variable][::-1].rolling(8).sum()[::-1]

df['time_day'] = pd.to_datetime(df['Time']).apply(lambda x: x.strftime("%H"))

dfweekdays = pd.get_dummies(df.Day_week, prefix='week')
df = df.join(dfweekdays, how = 'left')
```

```
In [8]: #we check that we have created the new variables
df.columns
```

```
Out[8]: Index(['Unnamed: 0', 'times', 'med_census', 'surg_census', 'Day_week',
'total_census', 'Time', 'date', 'med_admits', 'surg_admits',
'total_admits', 'med_disc', 'surg_disc', 'total_disc',
'prev_3h_med_admits', 'prev_3h_surg_admits', 'prev_3h_total_admits',
'prev_3h_med_disc', 'prev_3h_surg_disc', 'prev_3h_total_disc',
'prev_24h_med_admits', 'prev_24h_surg_admits', 'prev_24h_total_admits',
'prev_24h_med_disc', 'prev_24h_surg_disc', 'prev_24h_total_disc',
'time_day', 'week_Friday', 'week_Monday', 'week_Saturday',
'week_Sunday', 'week_Thursday', 'week_Tuesday', 'week_Wednesday'],
dtype='object')
```

```
In [9]: #here we subset the dataframe to include only data elements between 500 and 1750
#those are the ones that don't include the low
dffirst = df[14000:15500]
#df = df[0:14000]
```

```
In [10]: plt.figure(figsize=(18,8))
plt.xlabel('times')

ax1 = df.surg_census.plot(color='blue', grid=True, label='true census', linewidth = 0.7, alpha = 0.5)

h1, l1 = ax1.get_legend_handles_labels()

plt.legend(h1, l1, loc=2)
plt.show()
```

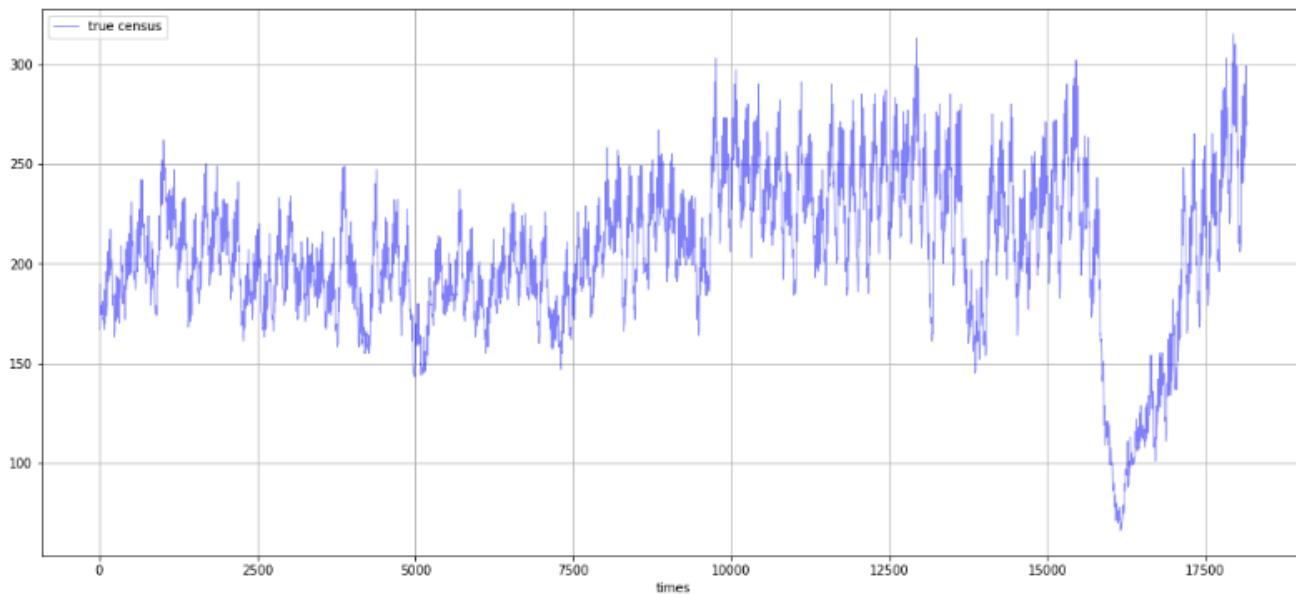

```
In [11]: df.time_day.head()
```

```
Out[11]: 0    00
1    01
2    02
3    03
4    04
Name: time_day, dtype: object
```

```
In [12]: #this is the data that I'm using for the model
```

```
plt.figure(figsize=(18,8))
plt.xlabel('times')

ax1 = df.total_census.plot(color='blue', grid=True, label='true census', linewidth = 0.7, alpha = 0.5)

h1, l1 = ax1.get_legend_handles_labels()

plt.legend(h1, l1, loc=2)
plt.title('hospital census by hour');
plt.xlabel('hours starting June 1st 2018');
plt.ylabel('number of patients in acute adult beds');
plt.show()
```

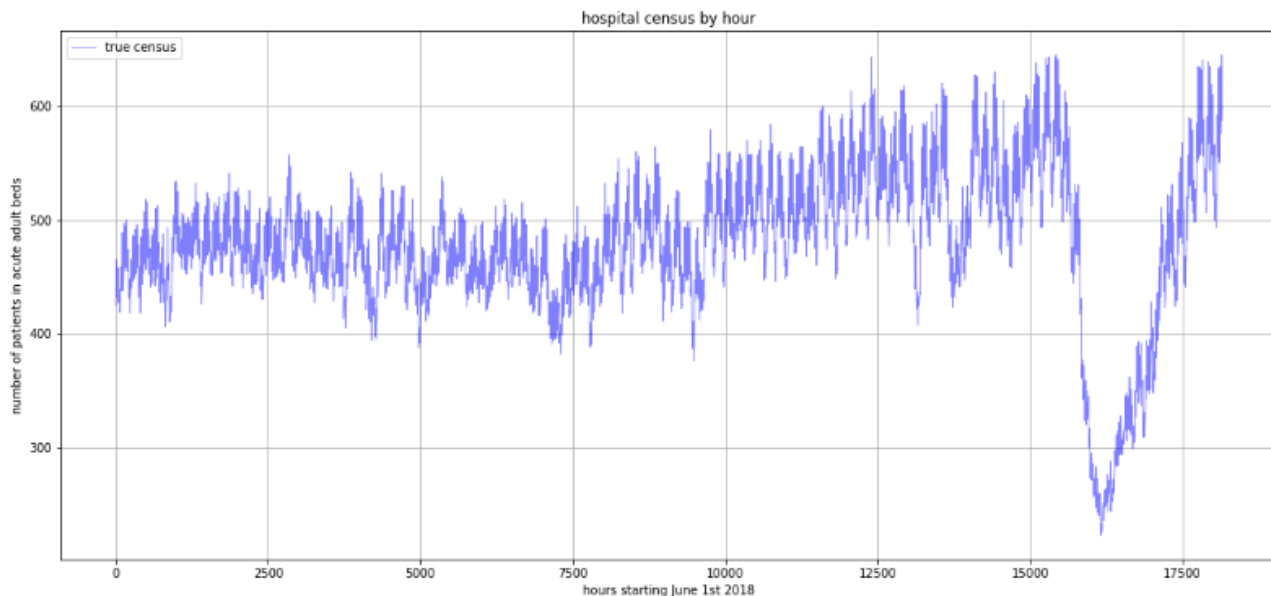

```
In [13]: df.total_census.mean()
```

```
Out[13]: 477.5844348975545
```

```
In [14]: #to check if we have any NaN, and where
```

```
#df.isnull().sum()
```

```
In [15]: #this is the prediction horizon (how many hours ahead are we predicting) and the outcome of interest
```

```
horizon = -12
```

```
outcome = 'total_census'
```

```
#we create our X matrix with only the predictors
```

```
exclude = ['Unnamed: 0', 'times', 'Time', 'date', 'Day_week']
```

```
predictors = [x for x in df.columns if x not in exclude]
```

```
n_valid_rows = len(df) + horizon
```

```
X = df[predictors].head(n_valid_rows)
```

```
### then our y vector with the outcomes of interest
```

```
#use this y for cumulatives
```

```
#y = df[outcome].rolling(-horizon).sum().shift(horizon).head(n_valid_rows)
```

```
#use this y for census
```

```
y = df[outcome].shift(horizon).head(n_valid_rows) - df[outcome].head(n_valid_rows)
```

```
##we separate into train and test
```

```
X_train = X[0:12500]
```

```
X_test = X[12500:15000]
```

```
y_train = y[0:12500]
```

```
y_test = y[12500:15000]
```

## Prediction using a linear model with ElasticNet regularization

```
In [16]: #X_train, X_test, y_train, y_test = train_test_split(X, y, test_size=0.2, random_state=42)
```

```
## and we run a model for each time of day
#you can comment out the print options to make it less verbose
maelist = []
mean_caseslist = []
residuals = np.array(0)
coefficientsdf = pd.DataFrame({'Column':X_train.columns})
intercept = pd.DataFrame({'Column': 'intercept'}, index = [0])
coefficientsdf = pd.concat([intercept,coefficientsdf], axis = 0, ignore_index = True)

for tod in np.sort(X_train['time_day'].unique()):
    X_train_time = X_train[X_train['time_day']==tod];
    y_train_time = y_train[X_train['time_day']==tod];
    X_test_time = X_test[X_test['time_day']==tod]
    y_test_time = y_test[X_test['time_day']==tod]

    en = ElasticNetCV(ll_ratio=[.05, .15, .5, .7, .9, .95, .99, 1],n_jobs=8)
    en.fit(X_train_time, y_train_time)
    print("MODEL FOR: " + str(tod) + "h")

    #print("Best for alphas:")
    #print(en.alpha_)
    #print("Best ll-ratio:")
    #print(en.ll_ratio_)

    #print("R-squared for Train: %.2f" % en.score(X_train_time, y_train_time))
    #print("R-squared for Test: %.2f" % en.score(X_test_time, y_test_time))
    y_pred_time = en.predict(X_test_time)
    # Calculate the absolute errors
    mae = round(np.mean(abs(y_pred_time - y_test_time)),2)
    residualsnow = (np.array(y_pred_time) - np.array(y_test_time))
    residuals = np.append(residuals,residualsnow)
    maelist.append(mae)
    mean_cases = round(np.mean(y_test_time),2)
    mean_caseslist.append(mean_cases)
    # Print out the mean absolute error (mae)
    #print('Mean Absolute Error:', mae, 'beds.')
    #print('Admits in the next', str(-horizon)+'h:', mean_cases, 'beds.')
    #print('')

    coefficients = pd.DataFrame({'(str(tod)+'h)':en.coef_})

    intercept = pd.DataFrame({'(str(tod)+'h)': en.intercept_}, index = [0])

    coefficients = pd.concat([intercept, coefficients], ignore_index=True)

    coefficientsdf = pd.concat([coefficientsdf, coefficients], axis=1)
```

```
MODEL FOR: 00h
MODEL FOR: 01h
MODEL FOR: 02h
MODEL FOR: 03h
MODEL FOR: 04h
MODEL FOR: 05h
MODEL FOR: 06h
MODEL FOR: 07h
MODEL FOR: 08h
MODEL FOR: 09h
MODEL FOR: 10h
MODEL FOR: 11h
MODEL FOR: 12h
MODEL FOR: 13h
MODEL FOR: 14h
MODEL FOR: 15h
MODEL FOR: 16h
MODEL FOR: 17h
MODEL FOR: 18h
MODEL FOR: 19h
MODEL FOR: 20h
MODEL FOR: 21h
MODEL FOR: 22h
MODEL FOR: 23h
```

```
In [17]: #X.head(10)
```

```
In [18]: #y
```

```
In [19]: #coefficientsdf
```

```
In [20]: coefficientsdf = coefficientsdf[coefficientsdf.Column != "time_day"]  
file_name = "coef"+str(outcome)+str(-horizon)+"h.csv"  
coefficientsdf.to_csv(file_name, index=False)
```

```
In [21]: file_name
```

```
Out[21]: 'coeftotal_census12h.csv'
```

```
In [22]: absresiduals = abs(residuals)  
np.percentile(residuals,95)
```

```
Out[22]: 17.816289162210367
```

```
In [23]: np.percentile(residuals,95)/X_test.total_census.mean()
```

```
Out[23]: 0.03394432345315463
```

```
In [ ]:
```

```
In [24]: absresiduals.mean()
```

```
Out[24]: 10.12447563105875
```

```
In [25]: plt.hist(residuals, bins = 24, color = 'skyblue');  
plt.title('Prediction error for 8h prediction of overall census');  
plt.xlabel('Deviation from predicted');  
plt.ylabel('count')
```

```
Out[25]: Text(0, 0.5, 'count')
```

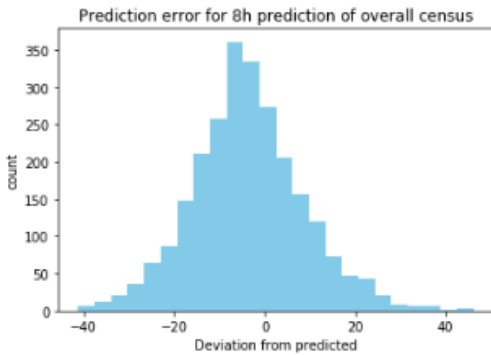

```
In [26]: sns.set_style('whitegrid');  
sns.kdeplot(residuals, bw=0.5);
```

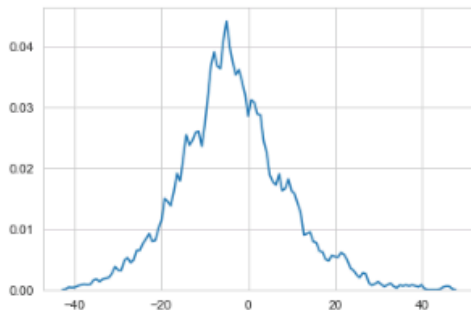

```
In [27]: plt.plot(maelist, c = "red");
plt.plot(mean_caseslist);
plt.title(str(outcome)+' and its prediction error (red) by time of day');
plt.xlabel('hour of day of the prediction (in military time)');
plt.ylabel('change in census in following 8h');
```

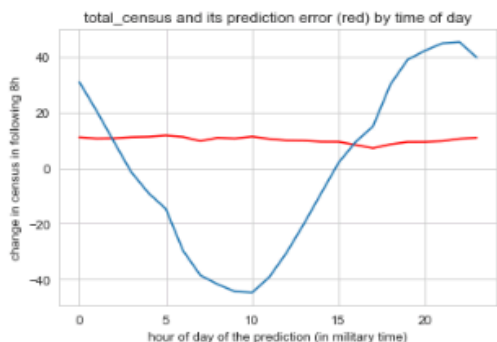

```
In [28]: plt.plot(maelist, c = "red");
absolute_value = [abs(ele) for ele in mean_caseslist]
plt.plot(absolute_value);
plt.title('absolute value of '+str(outcome)+' and its prediction error (red) by time of day');
```

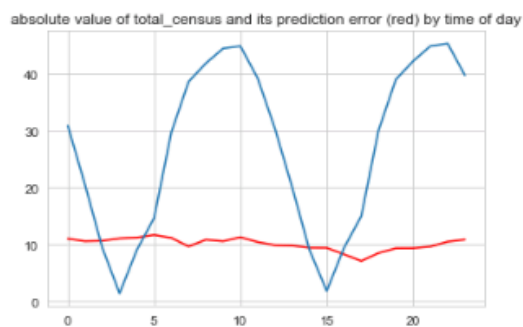

```
In [29]: np.mean(absolute_value)
```

```
Out[29]: 27.189583333333333
```

## GBM model

```
In [30]: ##### THIS TAKES A LONG TIME TO RUN (~10-25 min) #####
```

```
gb_hyperparameters = {
    "n_estimators": [50, 100, 200, 500],
    "min_samples_split": [2, 5, 7],
    "learning_rate": [0.01, 0.05],
    "min_samples_leaf": [2, 3],
    "max_depth": [2, 3, 5, 10]
}

#rf_random = RandomizedSearchCV(estimator = rf,
#                               param_distributions = random_grid,
#                               n_iter = 100, cv = 3, verbose=2,
#                               random_state=109, n_jobs = -1)

gbr = GradientBoostingRegressor(validation_fraction = 0.3)
#gs = GridSearchCV(estimator=gbr, param_grid=gb_hyperparameters, scoring='neg_mean_squared_error', cv=3, n_jobs=-1)
gs_random = RandomizedSearchCV(estimator = gbr,
                               param_distributions = gb_hyperparameters,
                               n_iter = 75, cv = 3, verbose=2,
                               random_state=109, n_jobs = -1)
gs_random = gs_random.fit(X_train, y_train)

gs_random.best_params_
```

Fitting 3 folds for each of 75 candidates, totalling 225 fits

```
[Parallel(n_jobs=-1)]: Using backend LokyBackend with 4 concurrent workers.
[Parallel(n_jobs=-1)]: Done 33 tasks | elapsed: 1.9min
[Parallel(n_jobs=-1)]: Done 154 tasks | elapsed: 6.0min
[Parallel(n_jobs=-1)]: Done 225 out of 225 | elapsed: 8.1min finished
```

```
Out[30]: {'n_estimators': 500,
'min_samples_split': 5,
'min_samples_leaf': 2,
'max_depth': 5,
'learning_rate': 0.01}
```

```
In [31]: gbr = gs_random.best_estimator_  
gbr.fit(X_train, y_train)
```

```
Out[31]: GradientBoostingRegressor(alpha=0.9, ccp_alpha=0.0, criterion='friedman_mse',  
init=None, learning_rate=0.01, loss='ls', max_depth=5,  
max_features=None, max_leaf_nodes=None,  
min_impurity_decrease=0.0, min_impurity_split=None,  
min_samples_leaf=2, min_samples_split=5,  
min_weight_fraction_leaf=0.0, n_estimators=500,  
n_iter_no_change=None, presort='deprecated',  
random_state=None, subsample=1.0, tol=0.0001,  
validation_fraction=0.3, verbose=0, warm_start=False)
```

```
In [32]: print("R-squared for Train: %.2f" % gbr.score(X_train, y_train))  
print("R-squared for Test: %.2f" % gbr.score(X_test, y_test))  
y_pred = gbr.predict(X_test)  
# Calculate the absolute errors  
mae = round(np.mean(abs(y_pred - y_test)),2)  
mean_cases = round(np.mean(y_test),2)  
# Print out the mean absolute error (mae)  
print('Mean Absolute Error:', mae, 'beds.')  
print('Average census', mean_cases, 'beds.')
```

```
R-squared for Train: 0.91  
R-squared for Test: 0.87  
Mean Absolute Error: 9.96 beds.  
Average census 0.14 beds.
```

```
In [33]: #residuals = y_pred - y_test  
np.percentile(residuals, 95)/X_test.total_census.mean()
```

```
Out[33]: 0.03394432345315463
```

```
In [34]: np.std(X_test.total_census)
```

```
Out[34]: 42.43054767499474
```

```
In [35]: X_train.total_census.mean()
```

```
Out[35]: 476.37552
```



```

In [36]: feature_importance = gbr.feature_importances_
sorted_idx = np.argsort(feature_importance)
pos = np.arange(sorted_idx.shape[0]) + .5
fig = plt.figure(figsize=(12, 6))
plt.subplot(1, 2, 1)
plt.barh(pos, feature_importance[sorted_idx], align='center')

#column_names = np.array(["Time of day", "Saturday", "Sunday", "Friday", "Total discharges"])
plt.yticks(pos, np.array(X_test.columns)[sorted_idx])
#plt.yticks(pos, column_names[sorted_idx])

plt.title('Feature Importance (MDI) fro Gradient Boosted model')

result = permutation_importance(gbr, X_test, y_test, n_repeats=10,
                               random_state=42, n_jobs=2)
sorted_idx = result.importances_mean.argsort()
plt.subplot(1, 2, 2)
plt.boxplot(result.importances[sorted_idx].T,
            vert=False, labels=np.array(X_test.columns)[sorted_idx])
plt.title("Permutation Importance (test set)")
fig.tight_layout()
plt.show()

```

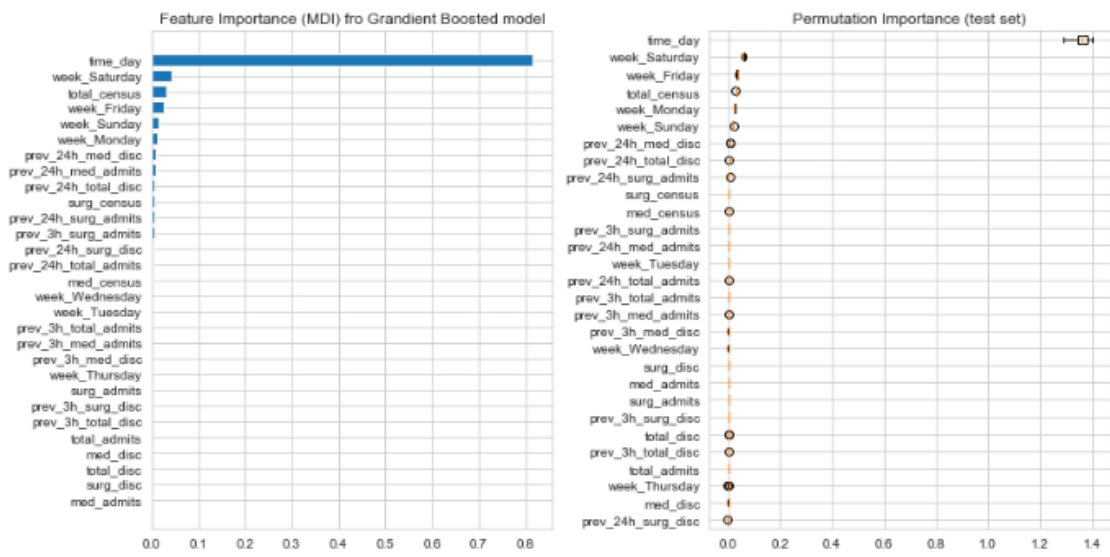

## Naive Model

Predict total census by simply calculating the average rate of increase between t0 and t12 for each time of the day and each day of the week.

```
In [37]: X_train.head()
```

```
Out[37]:
```

|   | med_census | surg_census | total_census | med_admits | surg_admits | total_admits | med_disc | surg_disc | total_disc | prev_3h_med_admits | ... | prev_24h_surg_di |
|---|------------|-------------|--------------|------------|-------------|--------------|----------|-----------|------------|--------------------|-----|------------------|
| 0 | 258        | 167         | 425          | 1          | 0           | 1            | 0        | 0         | 0          | 1.0                | ... | 0                |
| 1 | 260        | 167         | 427          | 2          | 0           | 2            | 0        | 0         | 0          | 3.0                | ... | 0                |
| 2 | 259        | 167         | 426          | 0          | 0           | 0            | 1        | 0         | 1          | 3.0                | ... | 0                |
| 3 | 262        | 168         | 430          | 3          | 1           | 4            | 0        | 0         | 0          | 5.0                | ... | 0                |
| 4 | 263        | 168         | 431          | 1          | 0           | 1            | 0        | 0         | 0          | 4.0                | ... | 0                |

5 rows x 29 columns

```
In [38]: # create the total census in 12 hours for each row
X_train['total_census_t12'] = X_train.total_census + y_train
X_test['total_census_t12'] = X_test.total_census + y_test

# create the ratio of census at t12 and at t0
X_train['total_census_ratio'] = X_train.total_census_t12 / X_train.total_census
```

```
In [39]: X_train.columns
```

```
Out[39]: Index(['med_census', 'surg_census', 'total_census', 'med_admits',
'surg_admits', 'total_admits', 'med_disc', 'surg_disc', 'total_disc',
'prev_3h_med_admits', 'prev_3h_surg_admits', 'prev_3h_total_admits',
'prev_3h_med_disc', 'prev_3h_surg_disc', 'prev_3h_total_disc',
'prev_24h_med_admits', 'prev_24h_surg_admits', 'prev_24h_total_admits',
'prev_24h_med_disc', 'prev_24h_surg_disc', 'prev_24h_total_disc',
'time_day', 'week_Friday', 'week_Monday', 'week_Saturday',
'week_Sunday', 'week_Thursday', 'week_Tuesday', 'week_Wednesday',
'total_census_t12', 'total_census_ratio'],
dtype='object')
```

### NAIVE MODEL USING TOD

```
In [40]: #calculate average ratio by TOD (times of a day)
navie_ratio_tod = pd.DataFrame(X_train.groupby('time_day').mean()['total_census_ratio'])
navie_ratio_tod.columns = ['total_census_ratio_tod_ave']
navie_ratio_tod
```

```
Out[40]:
```

|    | total_census_ratio_tod_ave |
|----|----------------------------|
| 00 | 1.052423                   |
| 01 | 1.035381                   |
| 02 | 1.017356                   |
| 03 | 0.999298                   |
| 04 | 0.985306                   |
| 05 | 0.975813                   |
| 06 | 0.953234                   |
| 07 | 0.938284                   |
| 08 | 0.933232                   |
| 09 | 0.929957                   |
| 10 | 0.930200                   |
| 11 | 0.938519                   |
| 12 | 0.951236                   |
| 13 | 0.966365                   |
| 14 | 0.984032                   |
| 15 | 1.001713                   |
| 16 | 1.015961                   |
| 17 | 1.025843                   |
| 18 | 1.050109                   |
| 19 | 1.066822                   |
| 20 | 1.072646                   |
| 21 | 1.076499                   |
| 22 | 1.076277                   |
| 23 | 1.066673                   |

```
In [41]: # calculate predicted total census at t12 using navie ratio tod on the **test set**
X_test_tod = pd.merge(X_test, navie_ratio_tod, how = 'left', on = 'time_day')
y_pred_naive_tod = np.array(X_test.total_census) * np.array(X_test_tod.total_census_ratio_tod_ave)
X_test_tod.head()
```

```
Out[41]:
```

|   | med_census | surg_census | total_census | med_admits | surg_admits | total_admits | med_disc | surg_disc | total_disc | prev_3h_med_admits | ... | time_day | week |
|---|------------|-------------|--------------|------------|-------------|--------------|----------|-----------|------------|--------------------|-----|----------|------|
| 0 | 305        | 220         | 525          | 3          | 1           | 4            | 0        | 0         | 0          | 6.0                | ... | 07       |      |
| 1 | 308        | 220         | 528          | 3          | 0           | 3            | 0        | 0         | 0          | 6.0                | ... | 08       |      |
| 2 | 309        | 220         | 529          | 1          | 0           | 1            | 0        | 0         | 0          | 7.0                | ... | 09       |      |
| 3 | 307        | 221         | 528          | 1          | 2           | 3            | 3        | 1         | 4          | 5.0                | ... | 10       |      |
| 4 | 307        | 215         | 522          | 2          | 0           | 2            | 4        | 6         | 10         | 4.0                | ... | 11       |      |

5 rows x 31 columns

```
In [42]: #MAE
mae_naive_tod = round(np.mean(abs(y_pred_naive_tod - X_test.total_census_t12)),2)

# 95 percentile residuals
residuals_naive_tod = (np.array(y_pred_naive_tod) - np.array(X_test.total_census_t12))
residuals_naive_tod_95 = np.percentile(residuals_naive_tod,95)

# average of absolute residuals
absresiduals_naive_tod = abs(residuals_naive_tod)
absresiduals_naive_tod_mean = absresiduals_naive_tod.mean()

print("mae for naive model using only times of the day: ",mae_naive_tod)
print("95 percentile residuals for naive model using only times of the day: ",residuals_naive_tod_95)
print("relative 95% error for naive model using only times of the day: ",residuals_naive_tod_95)
print("average of absolute residuals for naive model using only times of the day: ",absresiduals_naive_tod_mean)

mae for naive model using only times of the day: 14.42
95 percentile residuals for naive model using only times of the day: 29.67433648044756
relative 95% error for naive model using only times of the day: 29.67433648044756
average of absolute residuals for naive model using only times of the day: 14.41927948445061
```

```
In [43]: residuals_naive_tod_95 - absresiduals_naive_tod_mean
Out[43]: 15.25505699599695
```

```
In [44]: residuals_naive_tod_95/X_test.total_census.mean()
Out[44]: 0.05653676063400238
```

### NAIVE MODEL USING TOD & DOW

```
In [45]: # undo dummy DOW
dow_train = X_train[['week_Friday', 'week_Monday', 'week_Saturday', 'week_Sunday', 'week_Thursday', 'week_Tuesday', 'week_Wednesday']]
dow_train = pd.get_dummies(dow_train).idxmax(1)
X_train['dow'] = dow_train

dow_test = X_test[['week_Friday', 'week_Monday', 'week_Saturday', 'week_Sunday', 'week_Thursday', 'week_Tuesday', 'week_Wednesday']]
dow_test = pd.get_dummies(dow_test).idxmax(1)
X_test['dow'] = dow_test

X_train.head()
```

```
Out[45]:
```

|   | med_census | surg_census | total_census | med_admits | surg_admits | total_admits | med_disc | surg_disc | total_disc | prev_3h_med_admits | ... | week_Friday | we |
|---|------------|-------------|--------------|------------|-------------|--------------|----------|-----------|------------|--------------------|-----|-------------|----|
| 0 | 258        | 167         | 425          | 1          | 0           | 1            | 0        | 0         | 0          | 1.0                | ... | 1           |    |
| 1 | 260        | 167         | 427          | 2          | 0           | 2            | 0        | 0         | 0          | 3.0                | ... | 1           |    |
| 2 | 259        | 167         | 426          | 0          | 0           | 0            | 1        | 0         | 1          | 3.0                | ... | 1           |    |
| 3 | 262        | 168         | 430          | 3          | 1           | 4            | 0        | 0         | 0          | 5.0                | ... | 1           |    |
| 4 | 263        | 168         | 431          | 1          | 0           | 1            | 0        | 0         | 0          | 4.0                | ... | 1           |    |

5 rows x 32 columns

```
In [46]: #calculate average ratio by TOD (times of a day) and DOW (days of a week)
navie_ratio_tod_dow = pd.DataFrame(X_train.groupby(['time_day','dow']).mean()['total_census_ratio'])
navie_ratio_tod_dow.columns = ['total_census_ratio_tod_dow_ave']
navie_ratio_tod_dow.head(10)
```

```
Out[46]:
```

|    |                | total_census_ratio_tod_dow_ave |
|----|----------------|--------------------------------|
| 00 | week_Friday    | 1.060328                       |
|    | week_Monday    | 1.084959                       |
|    | week_Saturday  | 1.005496                       |
|    | week_Sunday    | 1.016283                       |
|    | week_Thursday  | 1.060053                       |
|    | week_Tuesday   | 1.070732                       |
|    | week_Wednesday | 1.070126                       |
| 01 | week_Friday    | 1.040454                       |
|    | week_Monday    | 1.071169                       |
|    | week_Saturday  | 0.990743                       |

```
In [47]: # calculate predicted total census at t12 using naive ratio tod_dow on the **test set**
X_test_tod_dow = pd.merge(X_test, naive_ratio_tod_dow, how = 'left', on = ['time_day', 'dow'])
y_pred_naive_tod_dow = np.array(X_test.total_census) * np.array(X_test_tod_dow.total_census_ratio_tod_dow_ave)
X_test_tod_dow.head()
```

```
Out[47]:
```

|   | med_census | surg_census | total_census | med_admits | surg_admits | total_admits | med_disc | surg_disc | total_disc | prev_3h_med_admits | ... | week_Friday | we |
|---|------------|-------------|--------------|------------|-------------|--------------|----------|-----------|------------|--------------------|-----|-------------|----|
| 0 | 305        | 220         | 525          | 3          | 1           | 4            | 0        | 0         | 0          | 6.0                | ... | 0           |    |
| 1 | 308        | 220         | 528          | 3          | 0           | 3            | 0        | 0         | 0          | 6.0                | ... | 0           |    |
| 2 | 309        | 220         | 529          | 1          | 0           | 1            | 0        | 0         | 0          | 7.0                | ... | 0           |    |
| 3 | 307        | 221         | 528          | 1          | 2           | 3            | 3        | 1         | 4          | 5.0                | ... | 0           |    |
| 4 | 307        | 215         | 522          | 2          | 0           | 2            | 4        | 6         | 10         | 4.0                | ... | 0           |    |

5 rows x 32 columns

```
In [48]: #MAE
mae_naive_tod_dow = round(np.mean(abs(y_pred_naive_tod_dow - X_test.total_census_t12)),2)

# 95 percentile residuals
residuals_naive_tod_dow = (np.array(y_pred_naive_tod_dow) - np.array(X_test.total_census_t12))
residuals_naive_tod_dow_95 = np.percentile(residuals_naive_tod_dow,95)

# average of absolute residuals
absresiduals_naive_tod_dow = abs(residuals_naive_tod_dow)
absresiduals_naive_tod_dow_mean = absresiduals_naive_tod_dow.mean()

print("mae for naive model using time of the day and day of the week: ",mae_naive_tod_dow)
print("95 percentile residuals for naive model using time of the day and day of the week: ",residuals_naive_tod_dow_95)
print("average of absolute residuals for naive model using time of the day and day of the week: ",absresiduals_naive_tod_dow_mean)

mae for naive model using time of the day and day of the week: 9.98
95 percentile residuals for naive model using time of the day and day of the week: 22.661824377954137
average of absolute residuals for naive model using time of the day and day of the week: 9.980184689441835
```

```
In [49]: residuals_naive_tod_dow_95 - absresiduals_naive_tod_dow_mean
```

```
Out[49]: 12.681639688512302
```

```
In [50]: residuals_naive_tod_dow_95/X_test.total_census.mean()
```

```
Out[50]: 0.043176235506744806
```

```
In [51]: X_test.total_census.mean()
```

```
Out[51]: 524.868
```
